# Supplementary material for: Establishment of a social conditioned place preference paradigm for the study of social reward in female mice
Source: PubMed Central journal article supplement (PMC9253334; doi:10.1038/s41598-022-15427-9), 2022-07-04
Supplement: 41598_2022_15427_MOESM1_ESM.pdf [file 41598_2022_15427_MOESM1_ESM.pdf]

## Establishment of a social conditioned place preference paradigm for the study of social reward in female mice

Zofia Harda<sup>1</sup>, Magdalena Chrószcz<sup>1</sup>, Klaudia Misiołek<sup>1</sup>, Marta Klimczak<sup>1</sup>, Łukasz Szumiec<sup>1</sup>, Maria Kaczmarczyk-Jarosz<sup>2</sup>, Jan Rodriguez Parkitna<sup>1\*</sup>

### Supplementary Figures

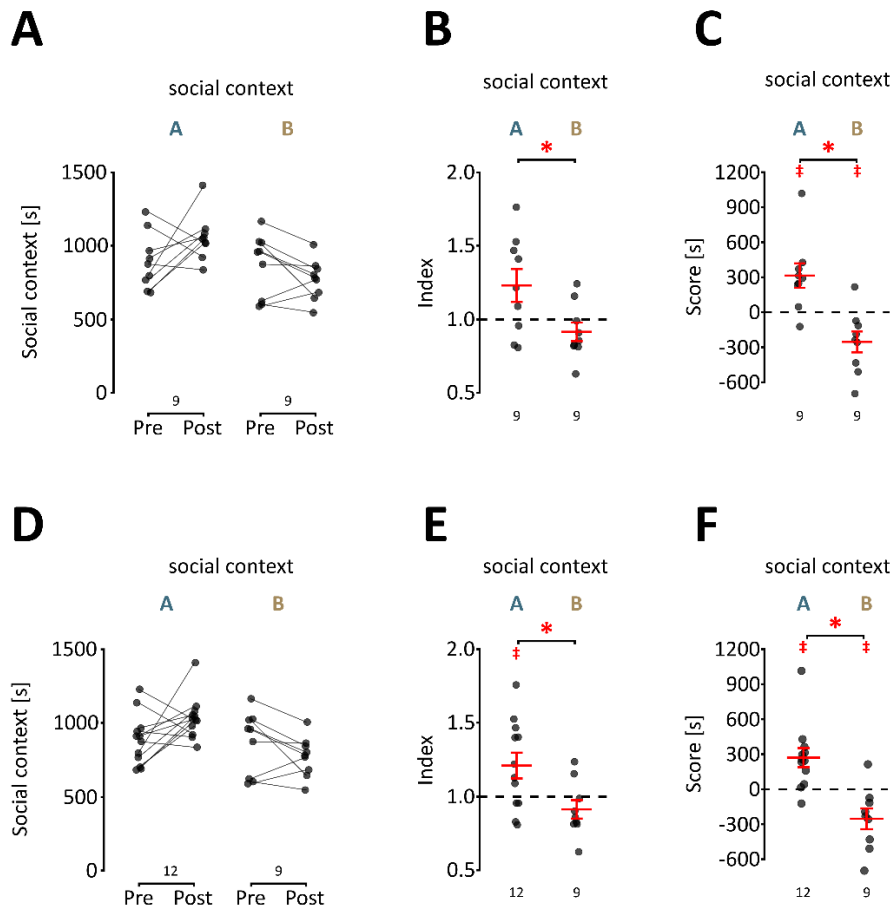

**Figure S1.** Acquired context preference. Panels A to C show the same data as panels H to J in Figure 2 but split between contexts, are D to F are the data before groups were “trimmed” to equal size.

**(A)** Time spent in contexts A and B during the pre- and post-test. For each animal, the times spent in the first context during pre- and post-tests are joined with a line. A significant increase from the pre- to post-test is marked with a red “\*” ( $p < 0.05$ , two-sample t test). Group sizes are indicated below.

Statistical analysis: two-way ANOVA *context*  $F_{1,16} = 15,85$ ,  $p = 0,0264$ , *pre-post*  $F_{1,16} = 0.6383$   $p = 0.5686$ ; *interaction*  $F_{1,16} = 10.96$   $p = 0.0282$ ; *post hoc* Bonferroni t test context A vs. B:  $t_8 = 2.117$   $p = 0.1005$  and  $t_8 = 1.294$   $p = 0.4281$ .

**(B)** Preference indices. The values represent the ratio between the time spent in the social context during the post-test to the corresponding time during the pre-test. The mean and s.e.m. values are shown in red. The “\*” symbol represents  $p < 0.05$  in two-sample t test comparison.

Comparison of A vs. B, two-sample t test,  $t_{16} = 2.457$   $p = 0.0258$ . One-sample t test vs. 1 (equal preference)  $t_8 = 2.079$   $p = 0.0712$  and  $t_8 = 1.317$   $p = 0.2244$  for contexts A and B, respectively.

**(C)** Preference scores. The values represent the difference in time spent in the social context and isolation context during the post-test. The mean and s.e.m. values are shown in red. A significant mean preference score is shown as a red “‡” ( $p < 0.05$ , one-sample t test vs. 0). The “\*” symbol represents  $p < 0.05$  in two-sample t test comparison.

Comparison of A vs. B, two-sample t test:  $t_{16} = 4.130$   $p = 0.0008$ . One-sample t test vs. 0 (no preference)  $t_8 = 3.012$   $p = 0.0168$  and  $t_8 = 2.832$   $p = 0.0221$  for contexts A and B, respectively.

**(D, E and F)** These graphs are the equivalents of B, C and D, respectively, but for mice first exposed to context B.

**(D)** Statistical analysis: two-way ANOVA *context*  $F_{1,19} = 13.91$ ,  $p = 0.0227$ , *pre-post*  $F_{1,19} = 0.4821$   $p = 0.5912$ ; *interaction*  $F_{1,19} = 11.01$   $p = 0.0172$ ; *post hoc* Bonferroni t test context A vs. B:  $t_{11} = 2.411$   $p = 0.0524$  and  $t_8 = 1.366$   $p = 0.3760$ .

**(E)** Comparison of A vs. B, two-sample t test,  $t_{19} = 2.590$   $p = 0.0180$ . One-sample t test vs. 1 (equal preference)  $t_{11} = 2.462$   $p = 0.0316$  and  $t_8 = 1.317$   $p = 0.2244$  for contexts A and B, respectively.

**(F)** Comparison of A vs. B, two-sample t test,  $t_{19} = 4.302$   $p < 0.000$ . One-sample t test vs. 0 (no preference)  $t_{11} = 3.332$   $p = 0.0067$  and  $t_8 = 2.832$   $p = 0.0221$  for contexts A and B, respectively.

## Supplementary Tables

Table S1. Neutral conditioning context selection

|       | n   | Context A        | Context B          | Excluded due to initial pref >70% | Preferred context | Preference | t test                             |
|-------|-----|------------------|--------------------|-----------------------------------|-------------------|------------|------------------------------------|
| Set 1 | 119 | Beech 1, Block 2 | Cellulose, Block 3 | 5                                 | B                 | 50.25      | $t_{113}=0.1189$ ,<br>$p = 0.9056$ |
| Set 2 | 16  | Beech 2, Block 2 | Corn*, Block 3     | 0                                 | B                 | 54.25      | $t_{15}=1.965$ ,<br>$p = 0.0683$   |
| Set 3 | 27  | Beech 3, Block 2 | Cellulose, Block 3 | 4                                 | A                 | 56.18      | $t_{22}=4.163$ ,<br>$p = 0.0004$   |
| Set 4 | 10  | Spruce, Block 2  | Cellulose, Block 3 | 3                                 | B                 | 62.93      | $t_6=9.000$ ,<br>$p = 0.0001$      |

\*Mice appeared to be eating the corn bedding

Table S2. The age and weight of the mice were tested for inherent bedding preference (Figure 1B)

| Set | Mean age (weeks) | Age range (weeks) | Mean weight [g] | Weight range [g] |
|-----|------------------|-------------------|-----------------|------------------|
| 1   | 13.69            | 11.6-16.7         | 21.26           | 17.8-24.5        |
| 2   | 11.98            | 9.9-15.9          | 21.20           | 20.0-22.8        |
| 3   | 13.00            | 12.1-13.3         | 23.19           | 20.6-25.7        |
| 4   | 11.57            | 11.6-11.6         | 21.64           | 20.2-23.4        |

Table S3. Age and weight of animals in the sCPP experiments\*

| Figure | Mean age at post-test [weeks] | Age range on post-test day [weeks] | Mean weight at pre-test [g] | Weight range at pre-test [g] | Conditioning length [days] | Familiarity            |
|--------|-------------------------------|------------------------------------|-----------------------------|------------------------------|----------------------------|------------------------|
| 1E-J   | 14.7                          | 13.6-15.3                          | 21.2                        | 19.1-24.5                    | 6                          | siblings               |
| 2B-J   | 14.7                          | 13.6-15.6                          | 21.3                        | 19.1-24.5                    | 6                          | siblings               |
| 3A-C   | 14.0                          | 12.3-17.1                          | 21.8                        | 19.6-23.6                    | 2                          | siblings               |
| 3C-D   | 8.7                           | 8.4-9.0                            | 18.8                        | 16.7-21.1                    | 2                          | siblings               |
| 4B-D   | 14.8                          | 14.4-15.0                          | 21.1                        | 19.2-23.3                    | 6                          | familiar nonsiblings   |
| 4E-G   | 14.6                          | 12.6-16.1                          | 20.4                        | 17.8-22.9                    | 6                          | unfamiliar nonsiblings |

\*Includes only animals shown on graphs; does not include mice with >70% initial preference or removed after trimming groups to equal size. Full dataset available: <https://doi.org/10.5281/zenodo.6347482>.

Table S4. Bedding brand names and suppliers

| Code      | Product name                                                                  | Supplier                                                                           | Link                                                                                                                                                                            |
|-----------|-------------------------------------------------------------------------------|------------------------------------------------------------------------------------|---------------------------------------------------------------------------------------------------------------------------------------------------------------------------------|
| Aspen 1   | ABEDD aspen animal bedding                                                    | Abedd SIA Jelgavas iela 29<br>Kalnciems, LV-3016 Latvia                            | <a href="https://www.abedd.com/">https://www.abedd.com/</a>                                                                                                                     |
| Aspen 2   | Tapvei GLP aspen bedding, #HP10KG                                             | Tapvei Estonia OÜ, Paekna küla,<br>Kiili vald, 75408 Harjumaa, Estonia             | <a href="https://tapvei.com/">https://tapvei.com/</a> ,<br><a href="https://animalab.eu/aspen-beddings">https://animalab.eu/aspen-beddings</a>                                  |
| Beech 1   | Trociny bukowe przesiane gat. 1                                               | P.P.H. "WO-JAR", Kopernika 3/30,<br>32-100 Proszowice, Poland                      | -                                                                                                                                                                               |
| Beech 2   | Trocinka bukowa Facmiech                                                      | PPHU Natur-Drew A. Czaja, os.<br>Kopernika 5/57, 34-100<br>Wadowice, Poland        | -                                                                                                                                                                               |
| Beech 3   | LIGNOCELL® HBK 1500-300                                                       | J. Rettenmaier and Sohne<br>GMBH+CO KG Holzmuhle 1, D-<br>73494 Rosenberg, Germany | <a href="https://www.jrs.eu/jrs_en/petcare/pets-dream.php">https://www.jrs.eu/jrs_en/petcare/pets-dream.php</a>                                                                 |
| Corn      | REHOFIX, Hygienic Animal Bedding                                              | J. Rettenmaier and Sohne<br>GMBH+CO KG Holzmuhle 1, D-<br>73494 Rosenberg, Germany | <a href="https://www.jrs.eu/jrs_en/corn-fiber/rehofix.php">https://www.jrs.eu/jrs_en/corn-fiber/rehofix.php</a>                                                                 |
| Cellulose | Biofresh Performance Bedding. 1/8' Pelleted Cellulose                         | ABSORPTION CORP 6960 Salashan<br>Parkway Ferndale, WA 98248, USA                   | <a href="https://scottpharma.net/product/biofresh-performance-bedding/">https://scottpharma.net/product/biofresh-performance-bedding/</a>                                       |
| Cotton    | Podłoże bawełniane dla gryzoni                                                | P.U i H CHABA Majora Hubala 28,<br>26-340 Drzewica, Poland                         | <a href="https://www.karusek.com.pl/produkty/chaba-podloze-bawelniane-dla-gryzoni-7l-8758">https://www.karusek.com.pl/produkty/chaba-podloze-bawelniane-dla-gryzoni-7l-8758</a> |
| Spruce    | LIGNOCELL® Premium Hygienic Animal Bedding, Spruce Premium Scientific Bedding | Rettenmaier and Sohne GMBH+CO<br>KG Holzmuhle 1, D-73494<br>Rosenberg, Germany     | <a href="https://www.jrs.eu">https://www.jrs.eu</a>                                                                                                                             |

Table S5. Gnawing blocks

| Code    | Name | Size [mm]    | Manufacturer                                                           | Link                                                                                            |
|---------|------|--------------|------------------------------------------------------------------------|-------------------------------------------------------------------------------------------------|
| Block 1 | SL   | 99 × 19 × 19 | Urszula Borgiasz Zoolab,<br>Zielona 14, 28-340<br>Sędziszów,<br>Poland | <a href="http://zoolab.pl/en/enrichment-elements/">http://zoolab.pl/en/enrichment-elements/</a> |
| Block 2 | LL   | 99 × 39 × 39 |                                                                        |                                                                                                 |
| Block 3 | LS   | 49 × 39 × 39 |                                                                        |                                                                                                 |
